# Supplementary material for: Natural Surface Emissions Dominate Anthropogenic Emissions Contributions to Total Gaseous Mercury (TGM) at Canadian Rural Sites
Source: Copernicus journal article supplement (doi:10.5194/egusphere-2024-2895), 2024-10-07
Supplement: Supplementary file 1 [file egusphere-2024-2895-supplement.pdf]

Table S1: TGM and ancillary data

| Measurement                                                                                                                                                                                 | Unit               | Data frequency | Network                                                                                                                                                                            |
|---------------------------------------------------------------------------------------------------------------------------------------------------------------------------------------------|--------------------|----------------|------------------------------------------------------------------------------------------------------------------------------------------------------------------------------------|
| TGM                                                                                                                                                                                         | ng m <sup>-3</sup> | hourly         | ECCC CAPMoN <sup>1</sup>                                                                                                                                                           |
| SO <sub>2</sub> , inorganic ions (Na <sup>+</sup> , K <sup>+</sup> , Cl <sup>-</sup> , Ca <sup>2+</sup> , Mg <sup>2+</sup> , SO <sub>4</sub> <sup>2-</sup> , NH <sub>4</sub> <sup>+</sup> ) | µg m <sup>-3</sup> | 24-h           | ECCC CAPMoN <sup>2</sup>                                                                                                                                                           |
| CO                                                                                                                                                                                          | ppm                | hourly         | ECCC National Air Pollution Surveillance (NAPS) program <sup>3</sup> , ECCC Canadian Greenhouse Gas Measurement program <sup>4</sup> , USEPA Air Quality System (AQS) <sup>5</sup> |
| Total carbon                                                                                                                                                                                | µg m <sup>-3</sup> | 1-in-3 day     | Interagency Monitoring of Protected Visual Environments (IMPROVE) <sup>6</sup>                                                                                                     |
| Air temperature                                                                                                                                                                             | °C                 | hourly         | ECCC Historical Climate Data <sup>7</sup>                                                                                                                                          |

<sup>1</sup><https://doi.org/10.18164/e1df5764-1eec-4a9f-9c03-f515b396b717>

<sup>2</sup><https://doi.org/10.18164/e73c7f47-df9c-4877-923c-20e09db28176>

<sup>3</sup><https://data-donnees.az.ec.gc.ca/data/air/monitor/national-air-pollution-surveillance-naps-program/>

<sup>4</sup><https://gaw.kishou.go.jp/>

<sup>5</sup><https://www.epa.gov/aqs>

<sup>6</sup><https://vista.cira.colostate.edu/Improve/improve-data/>

<sup>7</sup><https://climate.weather.gc.ca/>

Table S2: Descriptive statistics of 24-h average TGM concentrations (ng m<sup>-3</sup>) at Egbert (EGB), Kejimikujik (KEJ) and Saturna (SAT). P denotes percentile.

| Site | Year | N   | Mean | Median | StdDev | P5   | P25  | P75  | P95  | Min  | Max  |
|------|------|-----|------|--------|--------|------|------|------|------|------|------|
| EGB  | 2005 | 344 | 1.60 | 1.57   | 0.21   | 1.33 | 1.45 | 1.66 | 2.05 | 1.19 | 2.53 |
| EGB  | 2006 | 335 | 1.64 | 1.63   | 0.18   | 1.36 | 1.52 | 1.75 | 1.95 | 1.25 | 2.30 |
| EGB  | 2007 | 301 | 1.54 | 1.55   | 0.20   | 1.19 | 1.41 | 1.66 | 1.85 | 1.08 | 2.36 |
| EGB  | 2008 | 345 | 1.46 | 1.45   | 0.14   | 1.23 | 1.36 | 1.56 | 1.68 | 1.10 | 1.85 |
| EGB  | 2009 | 358 | 1.41 | 1.43   | 0.15   | 1.14 | 1.30 | 1.51 | 1.62 | 0.92 | 1.76 |
| EGB  | 2010 | 340 | 1.39 | 1.39   | 0.19   | 1.09 | 1.25 | 1.53 | 1.69 | 0.97 | 1.88 |
| EGB  | 2011 | 104 | 1.27 | 1.25   | 0.16   | 1.06 | 1.17 | 1.37 | 1.57 | 0.97 | 1.84 |
| EGB  | 2012 | 272 | 1.19 | 1.16   | 0.15   | 1.00 | 1.11 | 1.27 | 1.47 | 0.92 | 1.81 |
| EGB  | 2013 | 305 | 1.09 | 1.06   | 0.16   | 0.87 | 0.97 | 1.17 | 1.35 | 0.80 | 1.68 |
| EGB  | 2014 | 341 | 1.28 | 1.31   | 0.23   | 0.90 | 1.06 | 1.46 | 1.60 | 0.84 | 1.80 |
| EGB  | 2015 | 344 | 1.30 | 1.32   | 0.14   | 1.06 | 1.20 | 1.41 | 1.52 | 0.96 | 1.70 |
| EGB  | 2016 | 356 | 1.28 | 1.28   | 0.16   | 1.03 | 1.17 | 1.41 | 1.52 | 0.82 | 1.69 |
| EGB  | 2017 | 386 | 1.36 | 1.37   | 0.16   | 1.09 | 1.23 | 1.49 | 1.58 | 1.00 | 1.77 |
| EGB  | 2018 | 485 | 1.25 | 1.25   | 0.13   | 1.05 | 1.17 | 1.34 | 1.44 | 0.85 | 1.75 |
| KEJ  | 2005 | 332 | 1.73 | 1.53   | 0.75   | 1.12 | 1.32 | 1.82 | 3.19 | 0.99 | 6.87 |
| KEJ  | 2006 | 342 | 1.10 | 1.09   | 0.21   | 0.79 | 0.93 | 1.28 | 1.43 | 0.65 | 1.62 |
| KEJ  | 2007 | 312 | 1.16 | 1.15   | 0.15   | 0.94 | 1.05 | 1.27 | 1.40 | 0.71 | 1.52 |
| KEJ  | 2008 | 307 | 1.32 | 1.32   | 0.16   | 1.06 | 1.20 | 1.44 | 1.58 | 0.95 | 1.72 |
| KEJ  | 2009 | 341 | 1.27 | 1.27   | 0.17   | 1.01 | 1.15 | 1.40 | 1.48 | 0.83 | 2.38 |
| KEJ  | 2010 | 354 | 1.34 | 1.36   | 0.15   | 1.09 | 1.23 | 1.44 | 1.57 | 0.84 | 1.79 |
| KEJ  | 2011 | 346 | 1.37 | 1.41   | 0.17   | 1.05 | 1.24 | 1.50 | 1.57 | 0.97 | 1.62 |
| KEJ  | 2012 | 349 | 1.36 | 1.37   | 0.16   | 1.10 | 1.23 | 1.50 | 1.61 | 0.98 | 1.67 |
| KEJ  | 2013 | 345 | 1.30 | 1.33   | 0.16   | 1.01 | 1.19 | 1.44 | 1.51 | 0.79 | 1.67 |
| KEJ  | 2014 | 336 | 1.30 | 1.30   | 0.16   | 1.02 | 1.18 | 1.44 | 1.53 | 0.91 | 1.61 |
| KEJ  | 2015 | 350 | 1.19 | 1.21   | 0.16   | 0.91 | 1.06 | 1.33 | 1.39 | 0.74 | 1.53 |
| KEJ  | 2016 | 312 | 1.14 | 1.12   | 0.16   | 0.91 | 1.01 | 1.28 | 1.38 | 0.82 | 1.50 |
| KEJ  | 2017 | 140 | 1.17 | 1.21   | 0.11   | 0.92 | 1.12 | 1.25 | 1.28 | 0.83 | 1.34 |
| SAT  | 2009 | 274 | 1.36 | 1.35   | 0.21   | 1.06 | 1.20 | 1.52 | 1.73 | 0.94 | 2.01 |
| SAT  | 2010 | 266 | 1.50 | 1.51   | 0.17   | 1.24 | 1.39 | 1.61 | 1.75 | 1.14 | 2.53 |
| SAT  | 2011 | 302 | 1.35 | 1.36   | 0.13   | 1.15 | 1.25 | 1.43 | 1.55 | 0.83 | 1.75 |
| SAT  | 2012 | 334 | 1.22 | 1.24   | 0.12   | 1.01 | 1.14 | 1.31 | 1.40 | 0.91 | 1.54 |
| SAT  | 2013 | 287 | 1.33 | 1.33   | 0.12   | 1.13 | 1.25 | 1.43 | 1.51 | 0.90 | 1.61 |
| SAT  | 2014 | 333 | 1.26 | 1.27   | 0.10   | 1.10 | 1.20 | 1.33 | 1.41 | 1.00 | 1.53 |
| SAT  | 2015 | 263 | 1.16 | 1.16   | 0.11   | 0.99 | 1.09 | 1.22 | 1.31 | 0.76 | 1.61 |
| SAT  | 2016 | 153 | 1.37 | 1.38   | 0.07   | 1.23 | 1.33 | 1.42 | 1.49 | 1.18 | 1.57 |
| SAT  | 2018 | 314 | 1.38 | 1.38   | 0.11   | 1.19 | 1.32 | 1.44 | 1.54 | 1.08 | 1.97 |

Table S3: Long-term trends in cold and warm season TGM concentrations and source contributions from the PMF model. SAT: 2009-2015, EGB: 2006-2017, KEJ: 2005-2015. Cold season: Nov to Apr; warm season: May to Oct. Statistically significant ( $p < 0.1$ ) trends are shown in bold.

| Site                         | Parameter/Source                     | Cold Season Trend                            |                             | Significance | Warm Season Trend                            |                             | Significance |
|------------------------------|--------------------------------------|----------------------------------------------|-----------------------------|--------------|----------------------------------------------|-----------------------------|--------------|
|                              |                                      | Slope (ng m <sup>-3</sup> yr <sup>-1</sup> ) | Slope (% yr <sup>-1</sup> ) | p-value      | Slope (ng m <sup>-3</sup> yr <sup>-1</sup> ) | Slope (% yr <sup>-1</sup> ) | p-value      |
| SAT                          | Obs TGM                              | -0.0402                                      | -2.79                       | 0.114        | <b>-0.0587</b>                               | <b>-4.19</b>                | 0.053        |
|                              | Modeled TGM                          | -0.0303                                      | -2.15                       | 0.114        | <b>-0.0590</b>                               | <b>-4.23</b>                | 0.053        |
|                              | Background Hg                        | -0.0030                                      | -0.34                       | 0.821        | <b>0.0430</b>                                | <b>9.43</b>                 | 0.030        |
|                              | Shipping and SSA processing          | -0.0025                                      | -6.49                       | 0.788        | <b>-0.0551</b>                               | <b>-20.25</b>               | 0.070        |
|                              | Terrestrial GEM re-emissions         | -0.0067                                      | -5.36                       | 0.718        | -0.0386                                      | -11.40                      | 0.287        |
|                              | Local combustion                     | -0.0253                                      | -24.69                      | 0.311        | -0.0244                                      | -19.57                      | 0.497        |
|                              | Secondary sulfate                    | 0.0191                                       | -51.30                      | 0.297        | 0.0130                                       | -52.52                      | 0.297        |
|                              | Oceanic evasion                      | -0.0107                                      | -6.91                       | 0.902        | 0.0013                                       | 1.91                        | 0.371        |
|                              | Wildfires                            | -0.0033                                      | -23.27                      | 0.117        | 0.0042                                       | 4.99                        | 0.942        |
|                              | EGB                                  | Obs TGM                                      | <b>-0.0209</b>              | <b>-1.27</b> | 0.017                                        | <b>-0.0304</b>              | <b>-2.07</b> |
| Modeled TGM                  |                                      | <b>-0.0244</b>                               | <b>-1.46</b>                | 0.063        | <b>-0.0281</b>                               | <b>-1.94</b>                | 0.017        |
| Background Hg                |                                      | -0.0199                                      | -1.64                       | 0.264        | <b>-0.0310</b>                               | <b>-3.64</b>                | 0.067        |
| Road salt                    |                                      | 1.79E-10                                     | 0.00                        | 0.982        | <b>-0.0009</b>                               | <b>-11.48</b>               | 0.073        |
| Terrestrial GEM re-emissions |                                      | -0.0010                                      | -1.78                       | 0.701        | -0.0059                                      | -1.45                       | 0.765        |
| Local combustion             |                                      | 0.0021                                       | 3.08                        | 0.694        | 0.0027                                       | 7.56                        | 0.267        |
| Secondary sulfate            |                                      | <b>-3.99E-05</b>                             | <b>-12.45</b>               | 0.053        | -3.97E-07                                    | -12.45                      | 0.285        |
| Wildfires                    |                                      | 0                                            | NA                          | 0.798        | -0.0035                                      | -6.72                       | 0.195        |
| Crustal/soil                 |                                      | 0.0033                                       | 4.67                        | 0.651        | 0.0103                                       | 14.38                       | 0.447        |
| KEJ                          |                                      | Obs TGM                                      | -0.0232                     | -1.50        | 0.427                                        | -0.0199                     | -1.49        |
|                              | Modeled TGM                          | -0.0224                                      | -1.45                       | 0.434        | -0.0172                                      | -1.32                       | 0.294        |
|                              | Background Hg                        | -0.0134                                      | -1.20                       | 0.284        | <b>-0.0553</b>                               | <b>-4.61</b>                | 0.047        |
|                              | Regional emission and SSA processing | <b>-0.0183</b>                               | <b>-7.32</b>                | 0.083        | -0.0160                                      | -7.27                       | 0.157        |
|                              | Terrestrial GEM re-emissions         | 0.0008                                       | 6.45                        | 0.573        | <b>0.0306</b>                                | <b>-24.82</b>               | 0.050        |
|                              | Local combustion                     | 0.0002                                       | 3.74                        | 0.469        | 0                                            | 0                           | 0.791        |
|                              | Secondary sulfate                    | 0                                            | 0                           | 0.696        | 0                                            | NA                          | 0.765        |
|                              | Oceanic evasion                      | 0.0036                                       | 3.44                        | 0.331        | 0.0068                                       | 105.14                      | 0.220        |
|                              | Wildfires                            | 0.0002                                       | -692.67                     | 0.239        | <b>0.0029</b>                                | <b>-35.76</b>               | 0.057        |

Table S4: Long-term trends in cold and warm season relative source contributions. SAT: 2009-2015, EGB: 2006-2017, KEJ: 2005-2015. Cold season: Nov to Apr; warm season: May to Oct. Statistically significant ( $p < 0.1$ ) trends are shown in bold.

|                                  |                                          | Cold Season Trend           | Significance | Warm Season Trend           | Significance |
|----------------------------------|------------------------------------------|-----------------------------|--------------|-----------------------------|--------------|
| Site                             | Parameter/Source                         | Slope (% yr <sup>-1</sup> ) | p-value      | Slope (% yr <sup>-1</sup> ) | p-value      |
| SAT                              | pct Natural surface                      | 0.54%                       | 0.985        | 2.00%                       | 0.447        |
|                                  | pct Anthropogenic                        | -0.54%                      | 0.985        | -2.00%                      | 0.447        |
|                                  | pct Background Hg                        | 1.43%                       | 0.354        | <b>5.52%</b>                | 0.000        |
|                                  | pct Shipping and SSA processing          | -0.13%                      | 0.788        | <b>-3.75%</b>               | 0.070        |
|                                  | pct Terrestrial GEM re-emissions         | -0.56%                      | 0.604        | -1.75%                      | 0.494        |
|                                  | pct Local combustion                     | -1.75%                      | 0.311        | -1.80%                      | 0.740        |
|                                  | pct Secondary sulfate                    | 1.42%                       | 0.297        | 1.04%                       | 0.297        |
|                                  | pct Oceanic evasion                      | -0.66%                      | 0.902        | 0.39%                       | 0.217        |
|                                  | pct Wildfires                            | -0.20%                      | 0.127        | -0.26%                      | 0.651        |
|                                  | EGB                                      | pct Natural surface         | 0.07%        | 0.711                       | -0.03%       |
| pct Anthropogenic                |                                          | -0.07%                      | 0.711        | 0.03%                       | 0.821        |
| pct Background Hg                |                                          | -0.13%                      | 0.885        | -0.68%                      | 0.487        |
| pct Road salt                    |                                          | 0.22%                       | 0.598        | <b>-0.06%</b>               | 0.083        |
| pct Terrestrial GEM re-emissions |                                          | -0.08%                      | 0.725        | 0.12%                       | 0.841        |
| pct Local combustion             |                                          | 0.15%                       | 0.631        | 0.33%                       | 0.114        |
| pct Secondary sulfate            |                                          | <b>-2.00E-3%</b>            | 0.070        | 1.67E-5%                    | 0.349        |
| pct Wildfires                    |                                          | 0%                          | 0.654        | -0.16%                      | 0.501        |
| pct Crustal/soil                 |                                          | 0.29%                       | 0.497        | 0.93%                       | 0.304        |
| KEJ                              |                                          | pct Natural surface         | 0.59%        | 0.524                       | 1.60%        |
|                                  | pct Anthropogenic                        | -0.59%                      | 0.524        | -1.60%                      | 0.237        |
|                                  | pct Background Hg                        | 0.39%                       | 0.304        | <b>-3.01%</b>               | 0.010        |
|                                  | pct Regional emission and SSA processing | <b>-1.24%</b>               | 0.100        | <b>-1.22%</b>               | 0.104        |
|                                  | pct Terrestrial GEM re-emissions         | 0.06%                       | 0.746        | <b>3.40%</b>                | 0.048        |
|                                  | pct Local combustion                     | 0.01%                       | 0.469        | 0%                          | 0.791        |
|                                  | pct Secondary sulfate                    | 0%                          | 0.696        | 0%                          | 0.765        |
|                                  | pct Oceanic evasion                      | 0.24%                       | 0.317        | 0.58%                       | 0.140        |
|                                  | pct Wildfires                            | 0.01%                       | 0.361        | <b>0.32%</b>                | 0.052        |

SAT

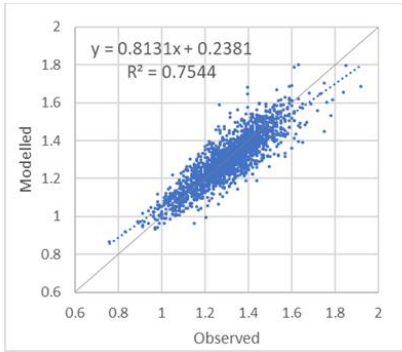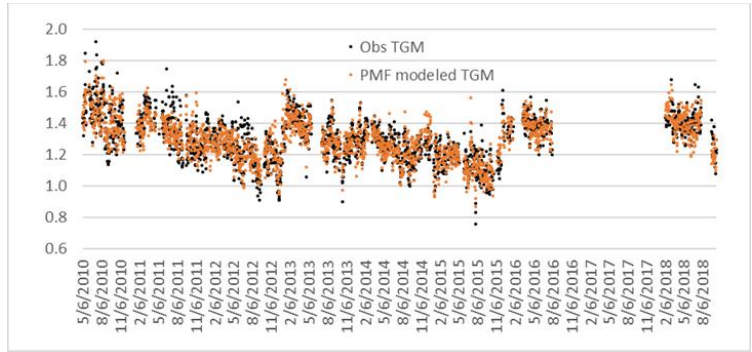

EGB

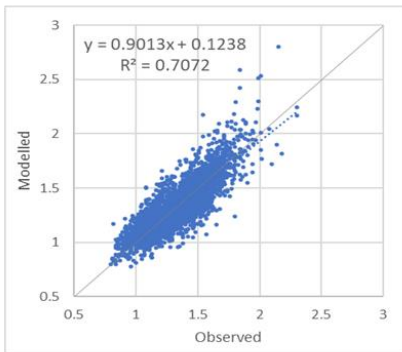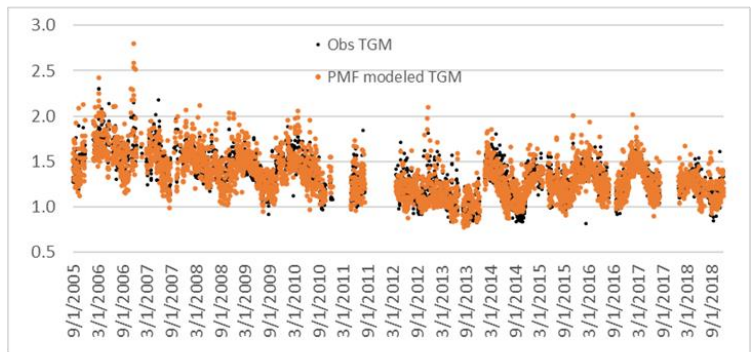

KEJ

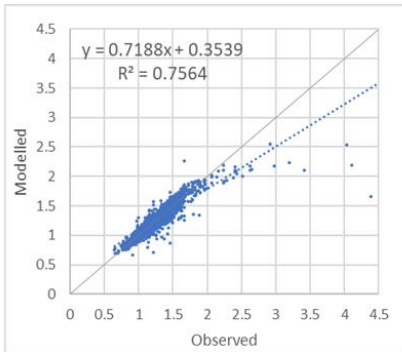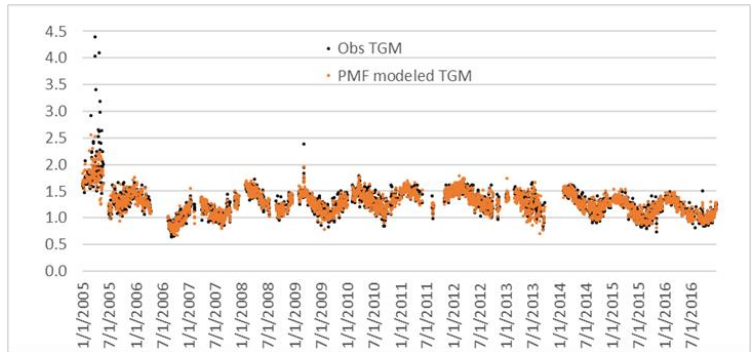

Figure S1: Comparison of PMF modelled and observed 24-h TGM using regression analysis (left) and time-series analysis (right)

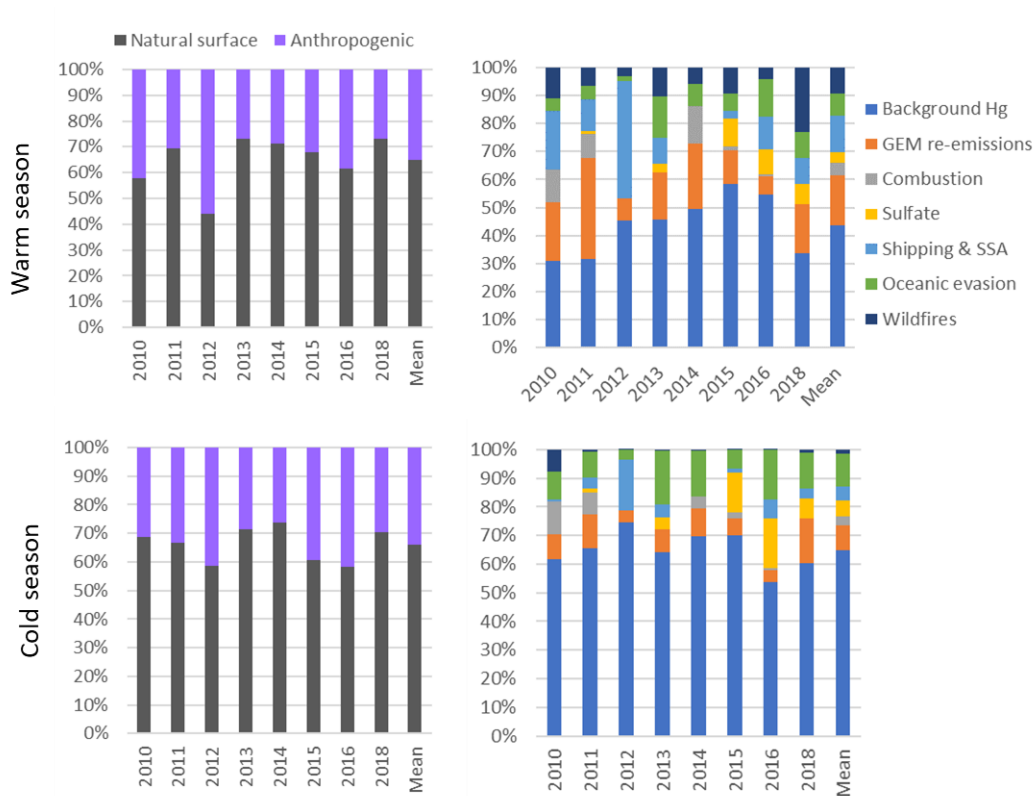

Figure S2: Relative source contributions to warm and cold season mean TGM at SAT. Mean applies to the 2010-2018 period except 2017. Warm season: May to Oct; cold season: Nov to Apr. Natural surface emissions comprise wildfires, GEM re-emissions, oceanic evasion, and natural surface emissions contributing to background Hg. Anthropogenic emissions comprise local combustion, sulfate, and anthropogenic emissions contributing to background Hg.

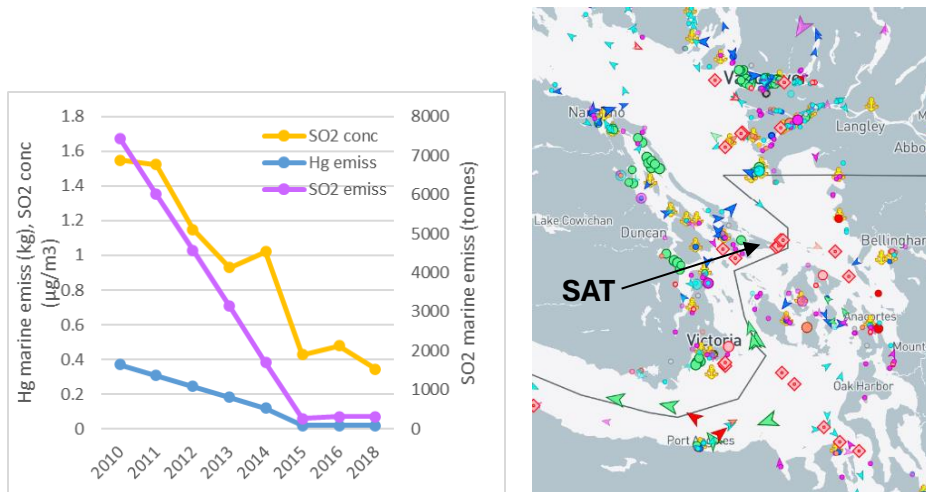

Figure S3: Left - Annual emissions of SO<sub>2</sub> and Hg from marine transportation reported for British Columbia (ECCC APEI, 2023). SO<sub>2</sub> ambient concentrations measured at SAT are also plotted. Right – Symbols represent ship traffic along the Strait of Georgia ([http://www.shiptraffic.net/marine-traffic/straits/Strait\\_of\\_Georgia](http://www.shiptraffic.net/marine-traffic/straits/Strait_of_Georgia)).

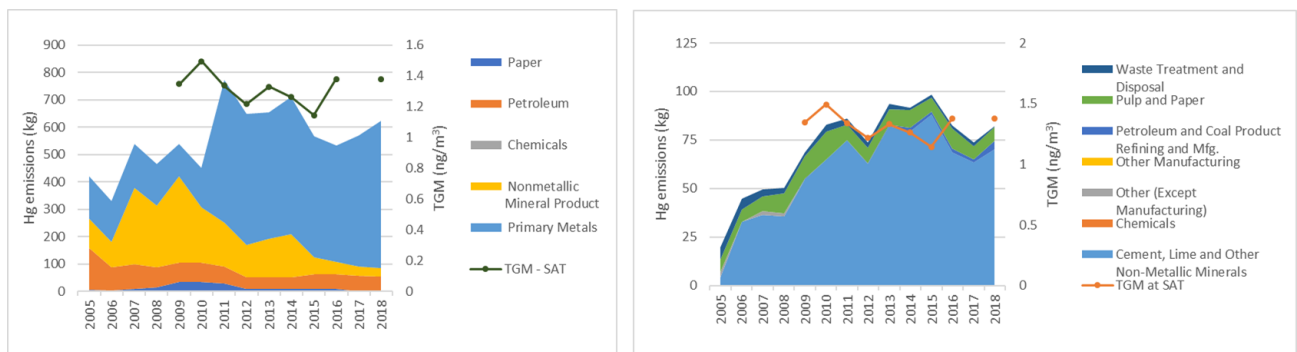

Figure S4: Hg emission sources within 150 km of SAT. Left: Washington State emissions (USEPA TRI, 2023); right: British Columbia emissions (ECCC NPRI, 2023)

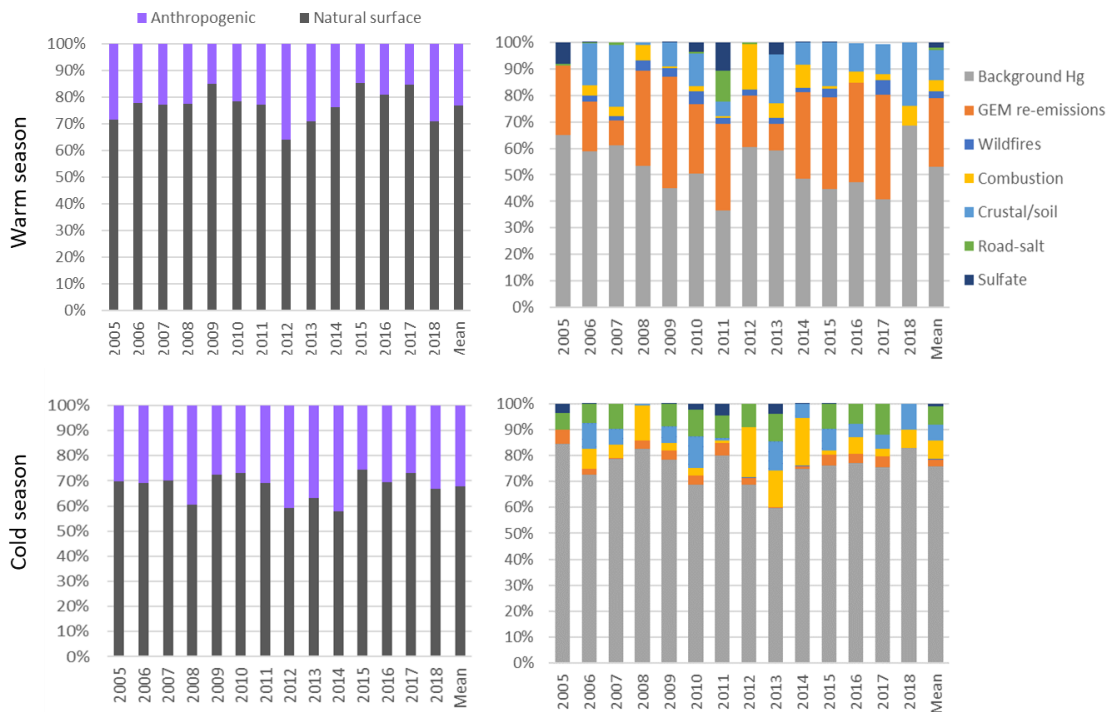

Figure S5: Relative source contributions to warm and cold season mean TGM at EGB. Mean applies to the 2005-2018 period. Warm season: May to Oct; cold season: Nov to Apr. Natural surface emissions comprise wildfires, GEM re-emissions, crustal/soil dust, road salt, and natural surface emissions contributing to background Hg. Anthropogenic emissions comprise local combustion, sulfate, and anthropogenic emissions contributing to background Hg.

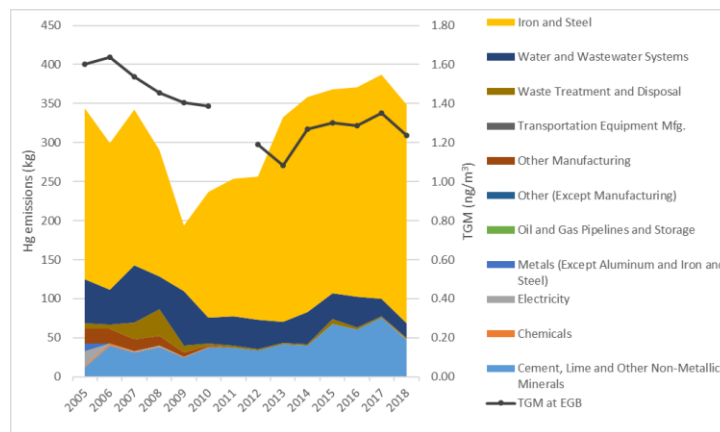

Figure S6: Hg emission sources within 150 km of EGB in Province of Ontario (ECCC NPRI, 2023)



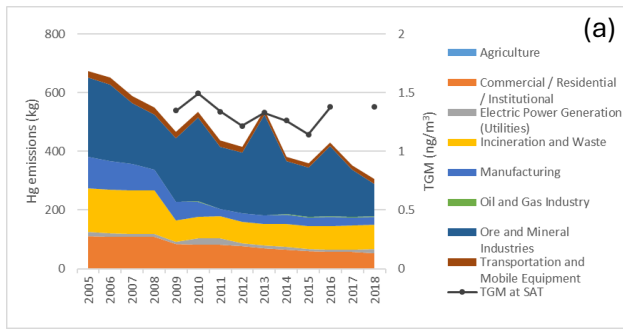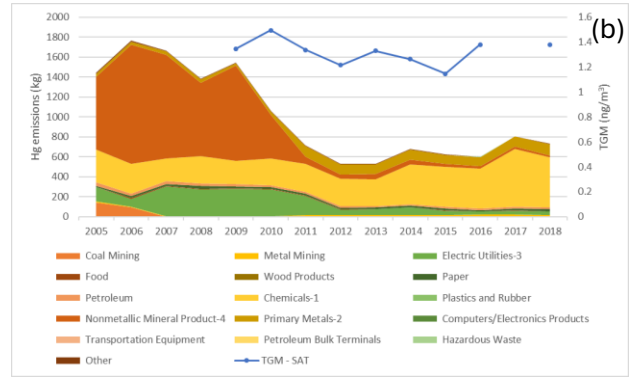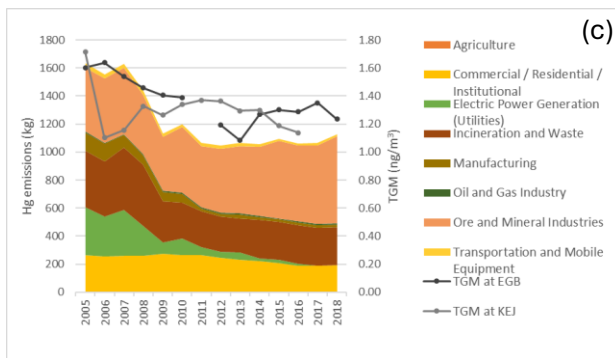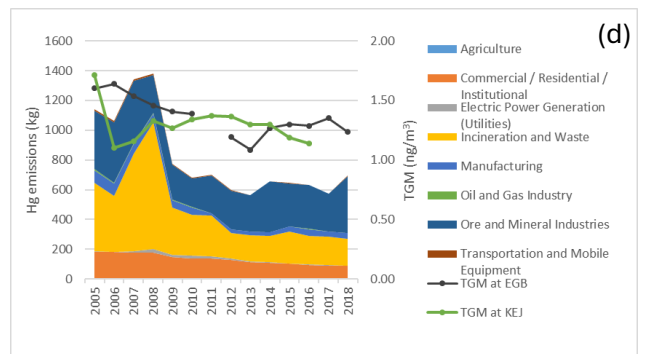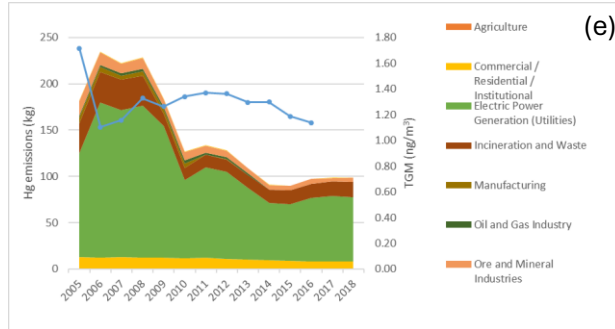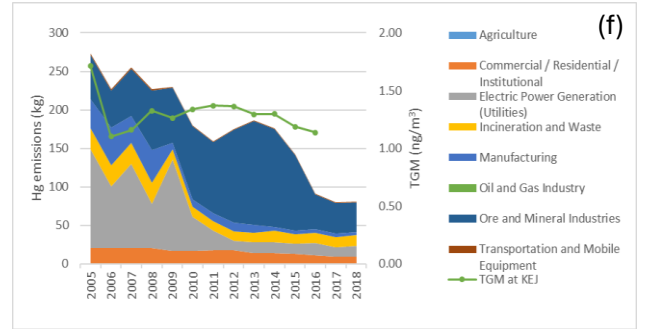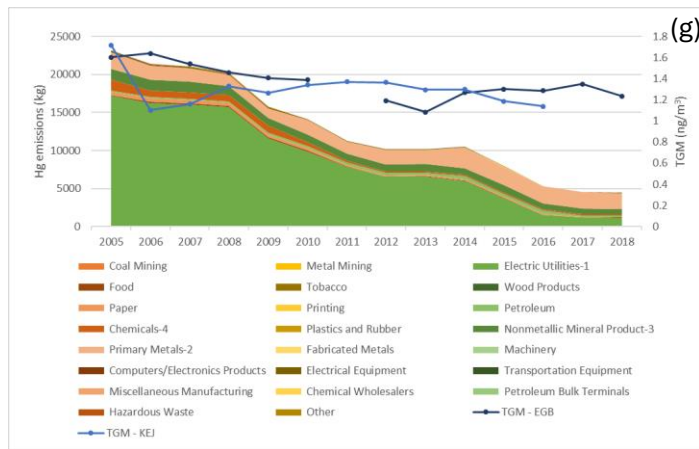

Figure S7: Regional Hg emission sources around SAT, EGB and KEJ. Emissions data for (a) British Columbia, (b) Northwestern U.S., (c) Ontario, (d) Quebec, (e) Nova Scotia, (f) New Brunswick, (g) Northeastern and midwestern U.S. Data sources: ECCC APEI (2023) for Canadian emissions, USEPA TRI (2023) for U.S. emissions.

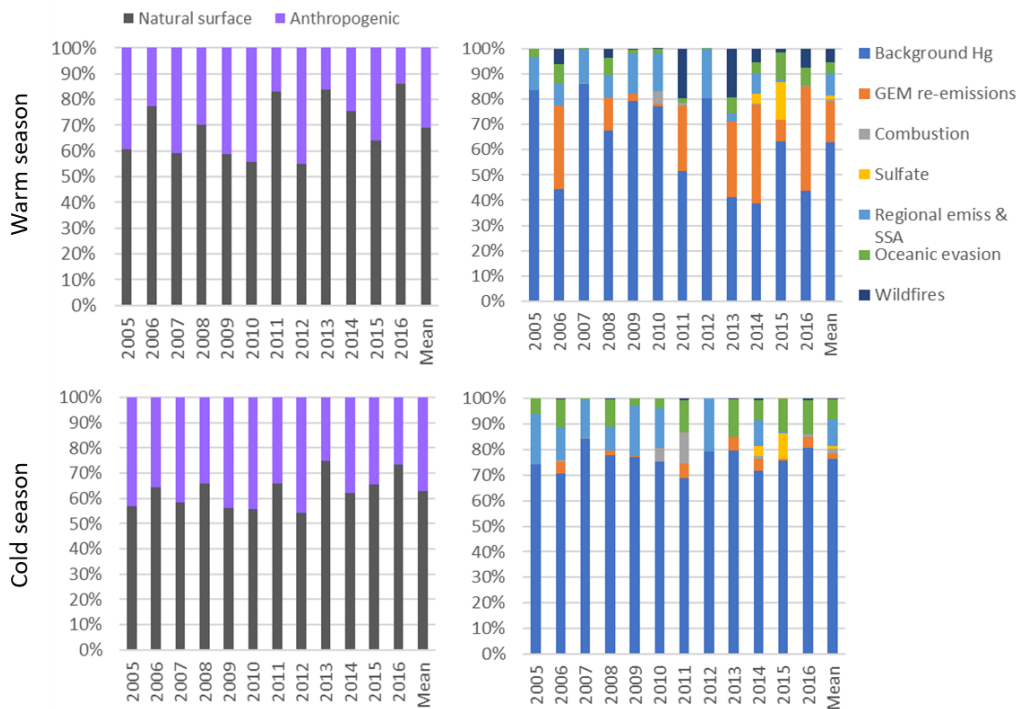

Figure S8: Relative source contributions to warm and cold season mean TGM at KEJ. Mean applies to the 2005-2016 period. Warm season: May to Oct; cold season: Nov to Apr. Natural surface emissions comprise wildfires, GEM re-emissions, oceanic evasion, and natural surface emissions contributing to background Hg. Anthropogenic emissions comprise local combustion, sulfate, regional emissions and sea-salt processing, and anthropogenic emissions contributing to background Hg.

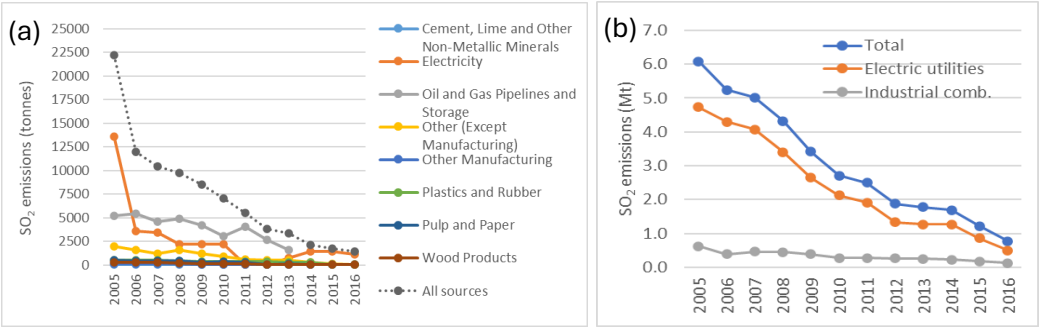

Figure S9: SO<sub>2</sub> emissions (a) local, within 150 km of KEJ (ECCC NPRI, 2023) and (b) regional, U.S. northeast and Midwest regions (USEPA NEI, 2023)

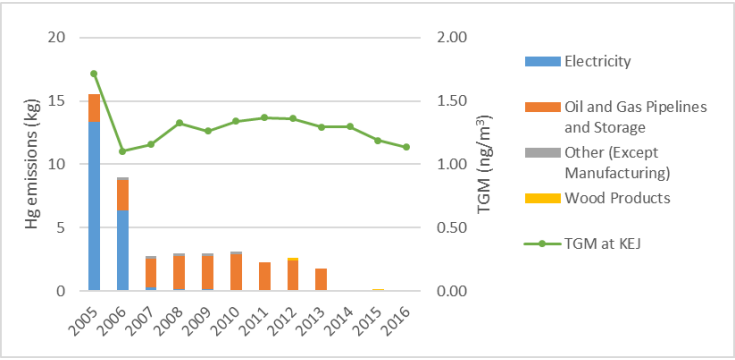

Figure S10: Hg emission sources within 150 km of KEJ in Provinces of Nova Scotia and New Brunswick (ECCC NPRI, 2023)

## References

ECCC APEI, 2023. Air Pollutant Emissions Inventory. <https://www.canada.ca/en/environment-climate-change/services/pollutants/air-emissions-inventory-overview.html>

ECCC NPRI, 2023. National Pollutant Release Inventory. <https://www.canada.ca/en/services/environment/pollution-waste-management/national-pollutant-release-inventory.html>

USEPA NEI, 2023. Air Emissions Inventory. <https://www.epa.gov/air-emissions-inventories>

USEPA TRI, 2023. Toxics Release Inventory program. <https://www.epa.gov/toxics-release-inventory-tri-program>
